# Supplementary material for: Ultrasensitive detection based on gold nanoparticles for the platelet-associated tissue factor in patients with thrombotic diseases
Source: Royal Society of Chemistry journal article supplement (doi:10.1039/c4ay01678e), 2014-08-28
Supplement: c4ay01678e1.pdf [file c4ay01678e1.pdf]

# **Ultrasensitive Detection Based on Gold Nanoparticles for Platelet-associated Tissue Factor in Patients with Thrombotic Diseases**

## **Index**

### **S1. Conjugation of streptavidin to catalase**

## S1. Conjugation of streptavidin to catalase

To establish the success of the conjugation reaction, ELISA plates were modified with biotinylated mouse anti-human IgG overnight. After washing and blocking the plates, different dilutions of streptavidin-AChE conjugate and unmarked AChE were added respectively to the plates, and the plasmonic signal was generated as stated in the main manuscript. In Fig. S1, the signal shows a dilution-dependent behaviour when streptavidin-AChE conjugate was added to the plate (blue) but not when unmarked AChE was added (red). These results demonstrate that the signal is specific and dose-dependent, and therefore that the conjugation was successful.

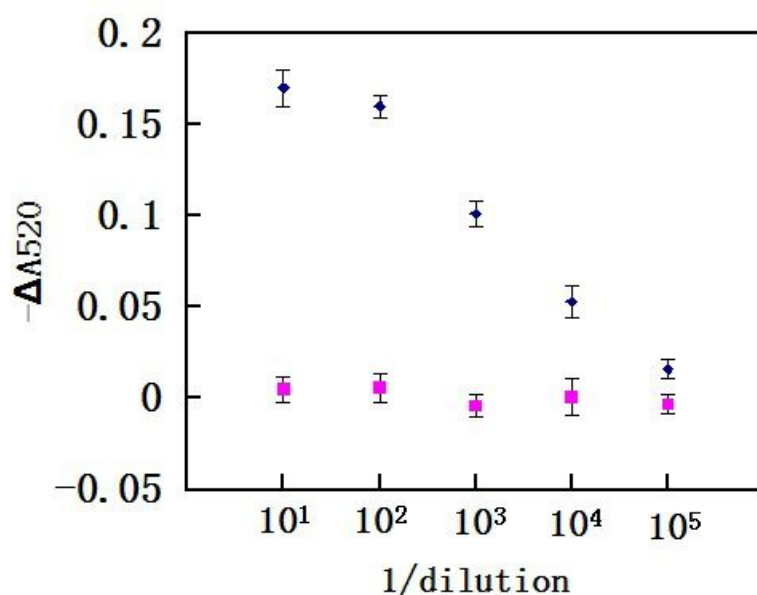

Fig. S1. The decreased value of corresponding peak absorbance of AuNPs in the plates modified with biotinylated mouse anti-human IgG after incubation with the streptavidin-catalase conjugate (♦) or unmarked AChE (■) at different dilutions. Error bars are the standard deviation ( $n = 3$ ).
